# Supplementary material for: Single atom tungsten doped ultrathin α-Ni(OH)2 for enhanced electrocatalytic water oxidation
Source: PubMed Central journal article supplement (PMC6517434; doi:10.1038/s41467-019-09845-z), 2019-05-14
Supplement: 41467_2019_9845_MOESM1_ESM.pdf [file 41467_2019_9845_MOESM1_ESM.pdf]

## Single atom tungsten doped ultrathin $\alpha$ -Ni(OH)<sub>2</sub> for enhanced electrocatalytic water oxidation

Yan et al.

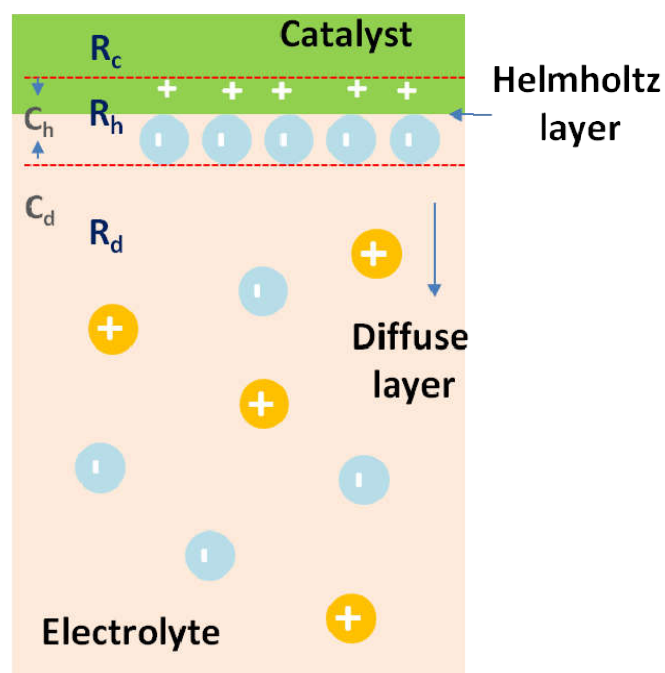

**Supplementary Figure 1.** Schematic diagram of the Helmholtz and diffuse layers in the electrocatalytic processes, the corresponding resistances i.e. catalyst ( $R_c$ ), double electrode layer ( $R_h$ ) and the electrolyte ( $R_d$ ) are also shown.

**Supplementary Table 1.** The fitted results of the EIS plots in **Figure 1b**.

| <b>Potential (V)</b> | <b><math>R_{\Omega}</math> (ohm/cm<sup>2</sup>)</b> | <b><math>R_{ct}</math> (ohm/cm<sup>2</sup>)</b> | <b><math>C_d</math></b>                |
|----------------------|-----------------------------------------------------|-------------------------------------------------|----------------------------------------|
| <b>1.2</b>           | <b>10.8</b>                                         | <b>277.4</b>                                    | <b><math>2.44 \cdot 10^{-6}</math></b> |
| <b>1.45</b>          | <b>16.7</b>                                         | <b>239.2</b>                                    | <b><math>3.08 \cdot 10^{-6}</math></b> |
| <b>1.6</b>           | <b>17.5</b>                                         | <b>168.6</b>                                    | <b><math>3.44 \cdot 10^{-6}</math></b> |

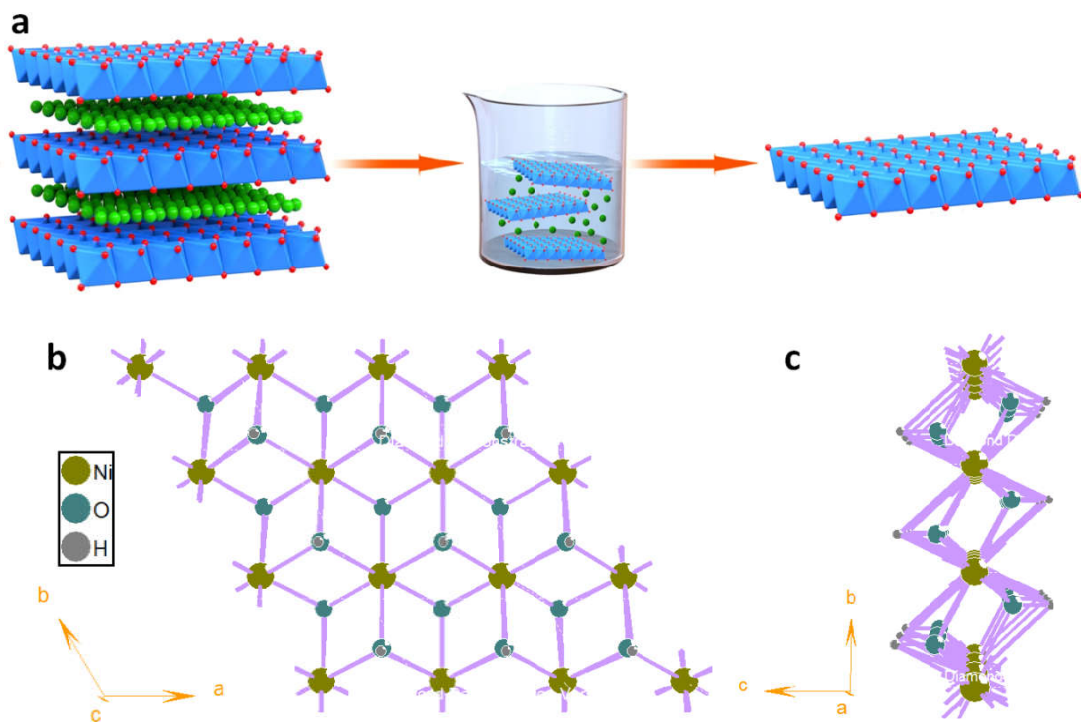

**Supplementary Figure 2.** (a) Schematic diagram of synthetic process of layered Ni(OH)<sub>2</sub>; (b) and (c) the model of Ni(OH)<sub>2</sub> from z- and a-axis direction.

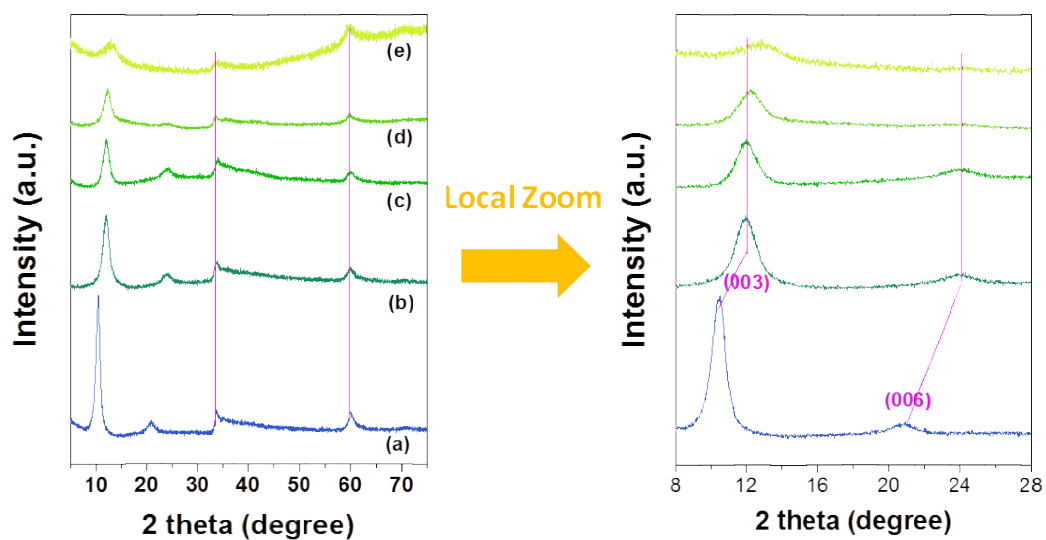

**Supplementary Figure 3.** XRD patterns of the w-Ni(OH)<sub>2</sub>-e sample treated by ultrasound under the different time: (a) 6h, (b) 12h, (c) 18h and (d) 24h. The right gives the local zoom result at the 2 theta range from 8 to 28 degree.

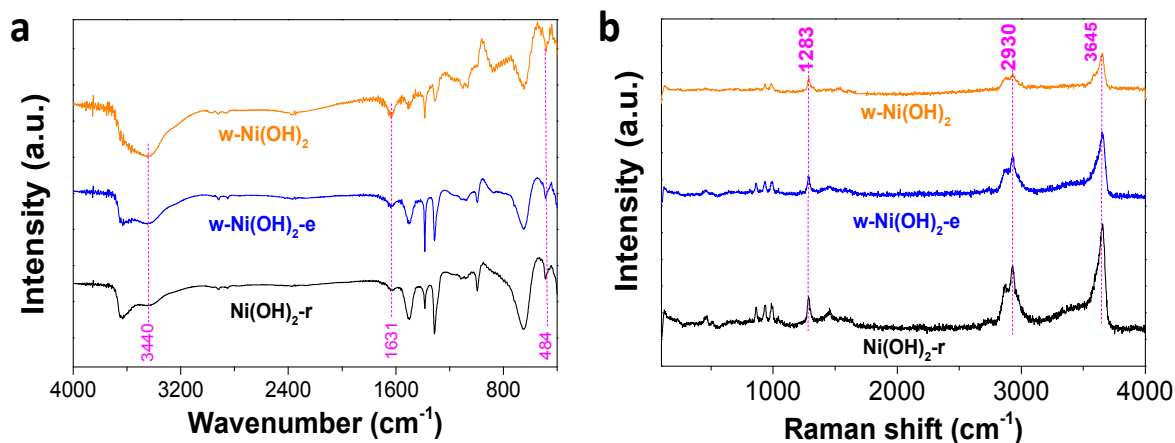

**Supplementary Figure 4.** (a) FTIR spectrum of the reference  $\text{Ni(OH)}_2\text{-r}$ ,  $\text{w-Ni(OH)}_2\text{-e}$  and  $\text{w-Ni(OH)}_2$  samples; (b) Raman spectra.

As is typical, the first peak at 484  $\text{cm}^{-1}$  could be attributed to the stretching vibrational mode of the M-OH [50-51]; the 1631  $\text{cm}^{-1}$  peak belonged to the free  $\text{H}_2\text{O}$  trapped by  $\text{Ni(OH)}_2$  and the 3440  $\text{cm}^{-1}$  peak was relative to the free  $\text{H}_2\text{O}$ . For the  $\text{w-Ni(OH)}_2$  samples, the signal intensities of the three OH-based groups showed slightly stronger peak distinctions compared with the bare  $\text{Ni(OH)}_2$  sample, suggesting that the exposed W sites were useful in aiding their adsorption.

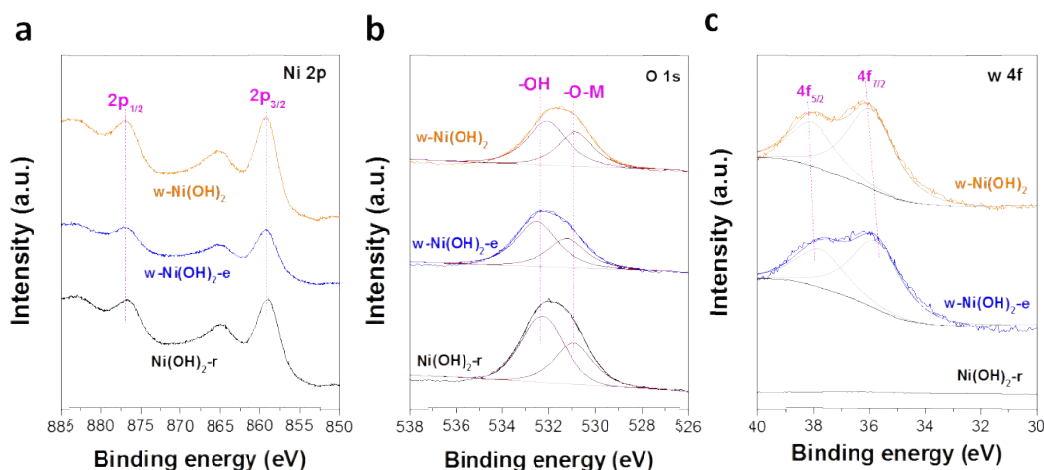

**Supplementary Figure 5.** XPS results of samples under study, (a) Ni 2p, (b) O 1s and (c) W 4f.

For Ni 2p (Figure S5a), the two main and typical signals i.e. 859 and 877 eV were detected. They were assigned to the Ni 2p<sub>3/2</sub> and Ni 2p<sub>1/2</sub> orbitals, respectively. In the case of O 1s in Figure S5b, the broad peak can be fitted to two signals, 530.9 and 532.4 eV, which belong to the O-M and O-H bonds, respectively. For the W doped samples, the Ni 2p and O 1s signals did not show any, suggesting that the W doping did not change the main electronic structure surrounding the Ni atom by any obvious means. Figure S5c shows the W 4f XPS signals. Two independent peaks of 35.7 and 37.8 eV belonged to the W 4f<sub>7/2</sub> and W 4f<sub>5/2</sub> of W<sup>6+</sup>, respectively, confirming the high valance element doping. However, the w-Ni(OH)<sub>2</sub> sample showed a slightly higher binding energy shift compared to w-Ni(OH)<sub>2</sub>-e. This may have originated from the slight change of the W doped Ni(OH)<sub>2</sub> structure after the exfoliation of the layered w-Ni(OH)<sub>2</sub>-e.

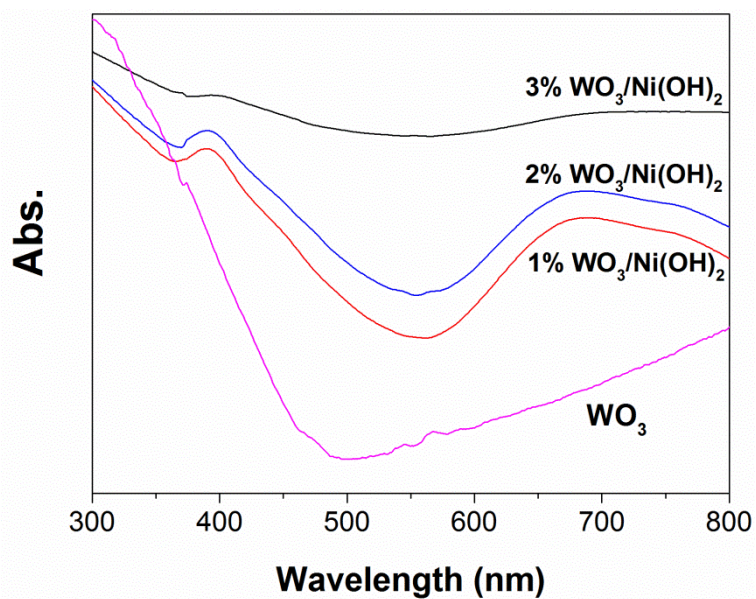

**Supplementary Figure 6.** UV-Vis absorption spectrum of the reference samples:  $\text{WO}_3$ , 1% 2% and 3%  $\text{WO}_3/\text{Ni}(\text{OH})_2$ . Please note that, the red-shift of  $\text{WO}_3/\text{Ni}(\text{OH})_2$  samples compared with bare  $\text{WO}_3$  can be assigned to the carrier migration across the interface between  $\text{WO}_3$  and  $\text{Ni}(\text{OH})_2$  (Appl. Catal. B, 2014, 152, 280-288).

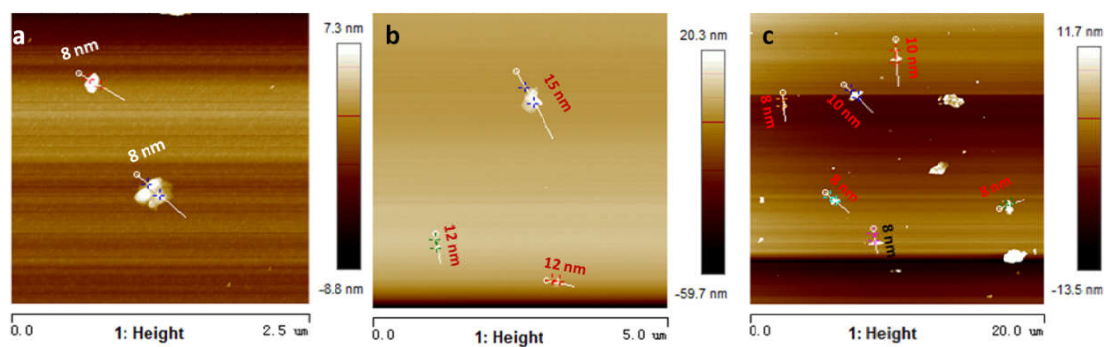

**Supplementary Figure 7.** AFM analysis of (a)  $\text{Ni(OH)}_2\text{-r}$ , (b)  $\text{w-Ni(OH)}_2\text{-e}$  and (c)  $\text{w-Ni(OH)}_2$ .



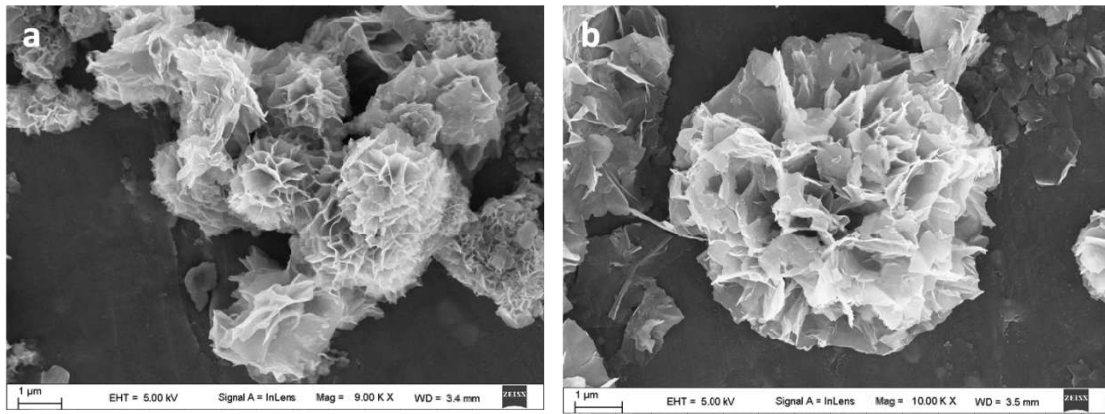

**Supplementary Figure 8.** SEM images of (a) the reference  $\text{Ni(OH)}_2$ -r sample and (b) w- $\text{Ni(OH)}_2$ -e.

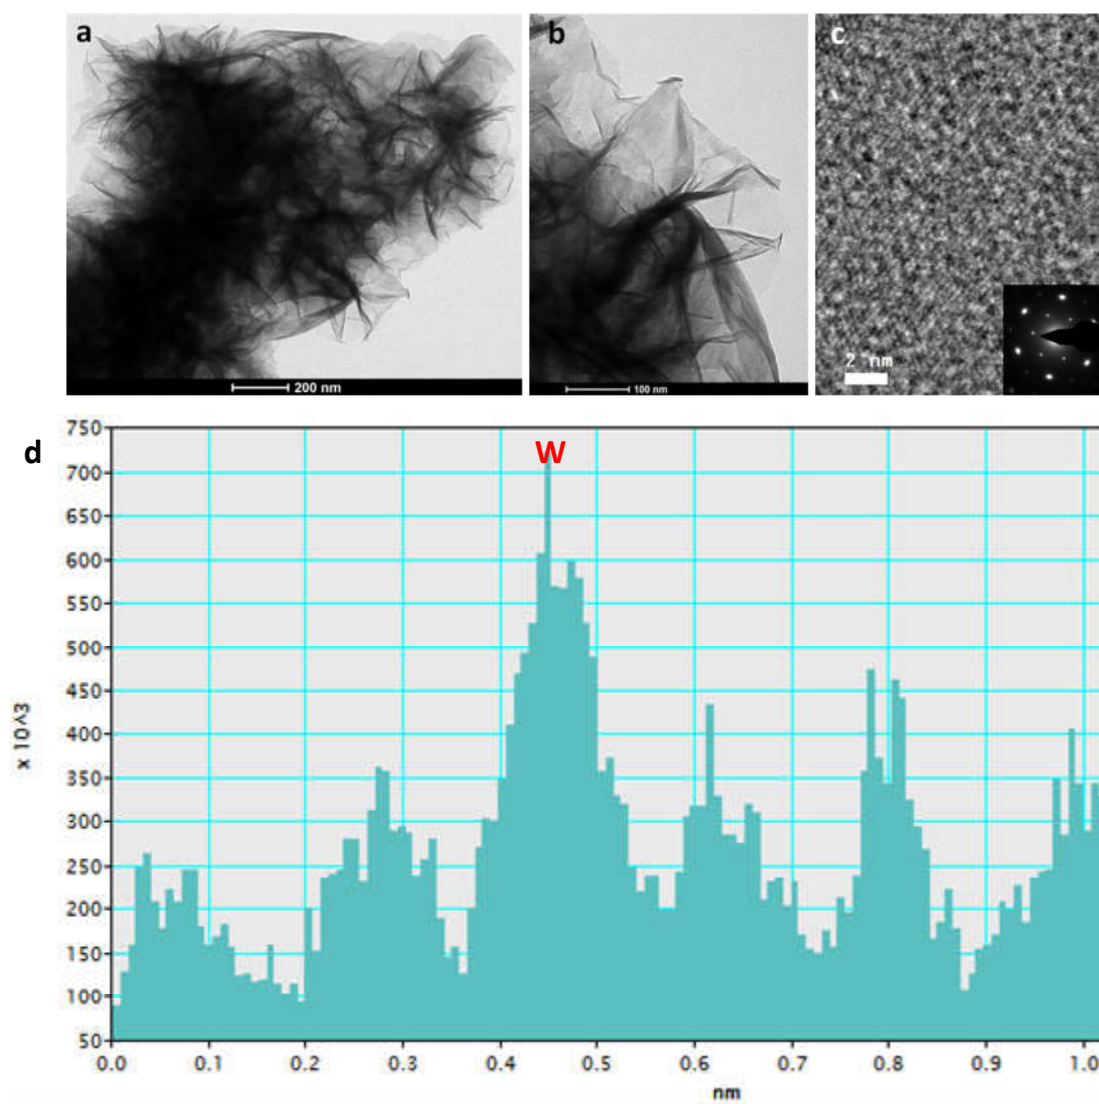

**Supplementary Figure 9.** TEM images of (a) the reference  $\text{Ni(OH)}_2$ -r sample, (b) w- $\text{Ni(OH)}_2$ -e, (c) HRTEM image of w- $\text{Ni(OH)}_2$ -e, the inset shows the corresponding EDS. (d) This result comes from Figure 3e.

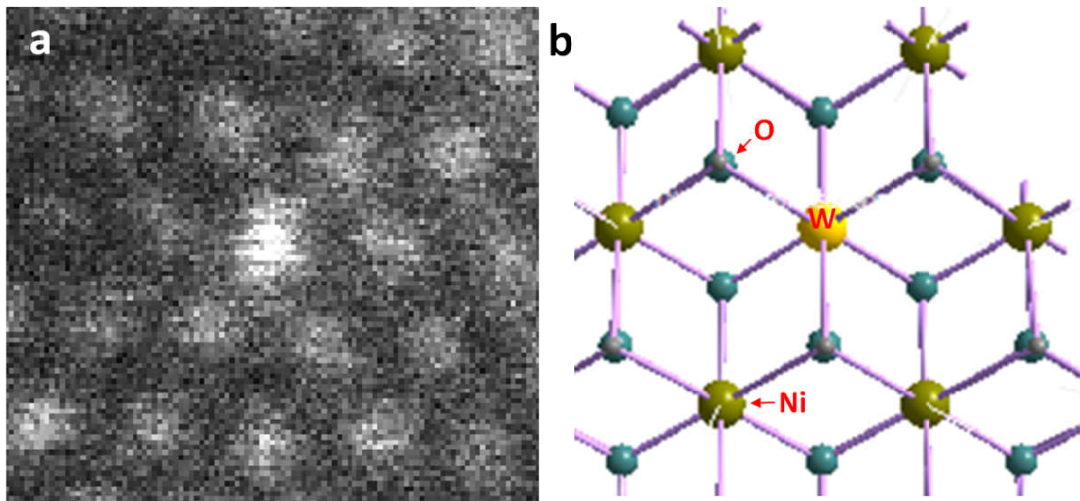

**Supplementary Figure 10.** (a) HADDF-STEM image of w-Ni(OH)<sub>2</sub> sample, (b) the mode of the W doped Ni(OH)<sub>2</sub>.

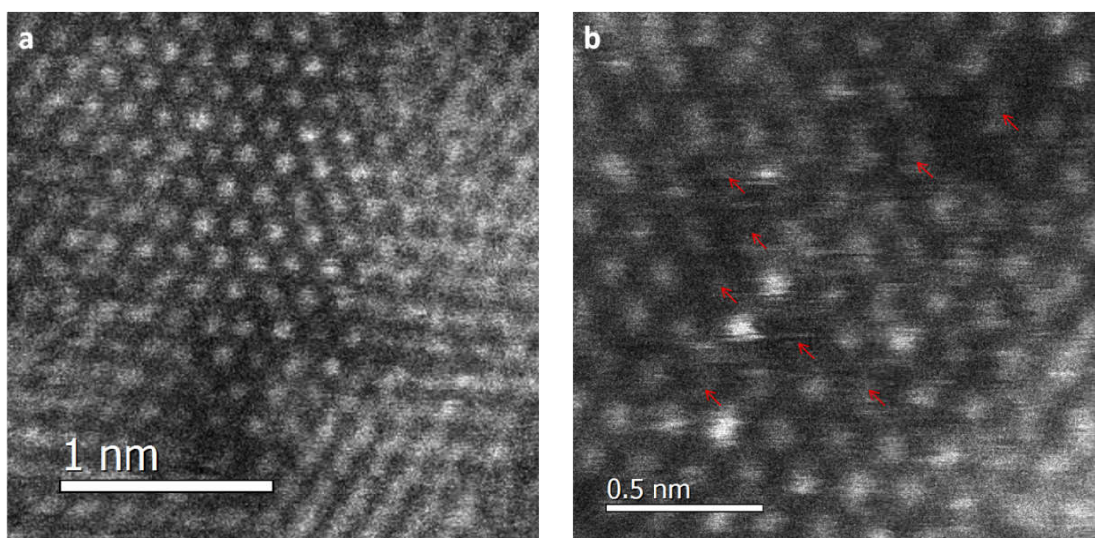

**SupplementaryFigure 11.** STEM images of pristine (a) and W doped (b) Ni(OH)<sub>2</sub> samples. The red arrows in b are corresponding disordered sites.

**Supplementary Table 2.** The atomic ratio of W to Ni of w-Ni(OH)<sub>2</sub> based samples.

| Sample                   | ICP-MS      | XPS         | TEM-EDS     |
|--------------------------|-------------|-------------|-------------|
| w-Ni(OH) <sub>2</sub> -e | 3.01 : 98   | 2.99 : 102  | 2.89 : 104  |
| w-Ni(OH) <sub>2</sub>    | 2.87 : 99.3 | 3.13 : 97.5 | 3.02 : 96.5 |

**Supplementary Table 3.** Comparison of catalytic performance of w-Ni(OH)<sub>2</sub> with reported Ni- based catalyst in 1.0 M KOH.

| Materials                                              | Support               | Loading<br>(mg cm <sup>-2</sup> ) | $\eta_{@10 \text{ mA cm}^{-2}}$<br>(mV) | $\eta_{@I \text{ mA cm}^{-2}}$<br>(mV) | Tafel slope<br>(mv/dec) | TOF <sub>@<math>\eta/v</math></sub><br>(s <sup>-1</sup> ) | ECSA <sub>@<math>v</math></sub><br>(mF cm <sup>-2</sup> ) | Ref.                 |
|--------------------------------------------------------|-----------------------|-----------------------------------|-----------------------------------------|----------------------------------------|-------------------------|-----------------------------------------------------------|-----------------------------------------------------------|----------------------|
| CS-NiFeCu                                              | Ni foam               | 10.2                              | 180                                     | 250 <sub>@248</sub>                    | 33                      | -                                                         | 54.24                                                     | S1                   |
| a-NiFe-OH/NiFeP                                        | Ni foam               | ~1.8                              | 199                                     | 258 <sub>@300</sub>                    | 39                      | 0.036 <sub>@0.25</sub>                                    | 6.3 <sub>@0.95</sub>                                      | S2                   |
| Au/NiFe LDH                                            | Ti mesh               | 2                                 | 237                                     | 280 <sub>@198</sub>                    | 36                      | 0.11 <sub>@0.28</sub>                                     | 0.49 <sub>@1.11</sub>                                     | S3                   |
| NiFeV LDHs                                             | Ni foam               | 2.8                               | 192                                     | 195 <sub>@20</sub>                     | 42                      | 0.04 <sub>@0.25</sub>                                     | 6.483 <sub>@1.07</sub>                                    | S4                   |
| Ni <sub>0.75</sub> V <sub>0.25</sub> -LDH              | GC electrode          | 0.143                             | -                                       | 350 <sub>@27</sub>                     | 50                      | -                                                         | 0.27 <sub>@1.25</sub>                                     | S5                   |
| NiCo LDH                                               | Carbon paper          | ~0.17                             | 367                                     | 300 <sub>@683</sub>                    | 40                      | -                                                         | -                                                         | S6                   |
| NiFeCr LDH                                             | Carbon paper          | 0.2                               | -                                       | 225 <sub>@25</sub>                     | 69                      | -                                                         | 1.176 <sub>@0.25</sub>                                    | S7                   |
| NiFe<br>LDH@NiCoP/N<br>F                               | Ni foam               | 2                                 | 220                                     | -                                      | 48.6                    | -                                                         | 18.07                                                     | S8                   |
| NiFe LDH/r-GO                                          | Ni foam               | 0.25                              | 206                                     | -                                      | 39                      | 0.987 <sub>@0.3</sub>                                     | -                                                         | S9                   |
| NiFe LDH/r-GO                                          | GC electrode          | 0.25                              | 230                                     | -                                      | 42                      | -                                                         | -                                                         | S10                  |
| Holey Ni(OH) <sub>2</sub>                              | GC electrode          | -                                 | 335                                     | -                                      | 65                      | 1.52 × 10 <sup>-2</sup> <sub>@0.35</sub>                  | -                                                         | S11                  |
| NiFeRu-LDH                                             | Ni foam               | -                                 | 225                                     | -                                      | -                       | -                                                         | -                                                         | S12                  |
| NiFe-OOH                                               | Ni foam               | -                                 | -                                       | 270 <sub>@240</sub>                    | 40                      | 0.146 <sub>@0.4</sub>                                     | -                                                         | S13                  |
| Ni <sub>3</sub> Fe <sub>0.5</sub> V <sub>0.5</sub> -OH | carbon fiber<br>paper | -                                 | 200                                     | 264 <sub>@100</sub>                    | 39                      | 0.574 <sub>@0.3</sub>                                     | -                                                         | S14                  |
| <b>w-Ni(OH)<sub>2</sub></b>                            | <b>GC electrode</b>   | <b>0.2</b>                        | <b>237</b>                              | <b>267<sub>@80</sub></b>               | <b>33</b>               | <b>0.74<sub>@0.25</sub></b>                               | <b>5<sub>@1.45</sub></b>                                  | <b>This<br/>work</b> |

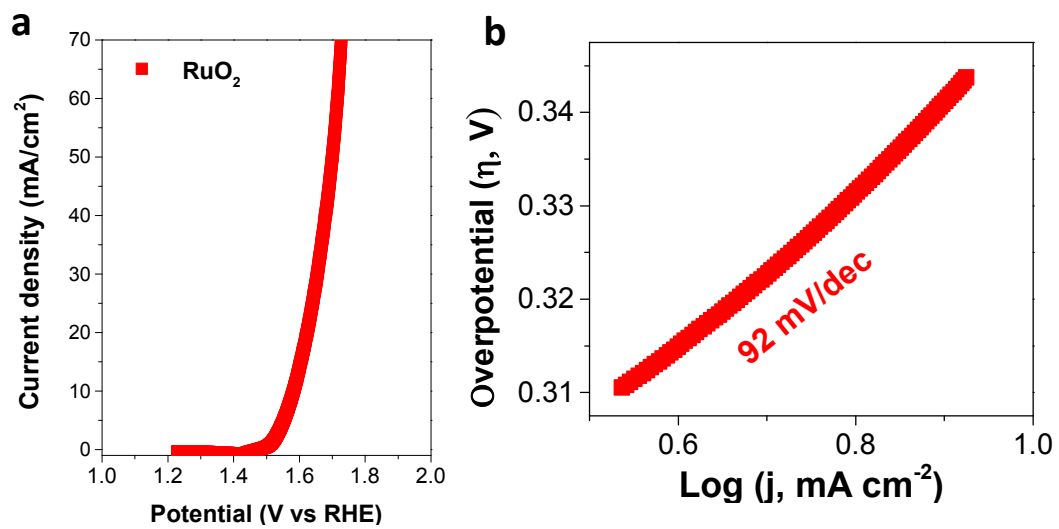

**Supplementary Figure 12.** (a) Polarization curve of RuO<sub>2</sub> and (b) the corresponding Tafel slope.

**Supplementary Table 4.** The fitted results of the EIS plots in **Figure 4d**.

| <b>Sample</b>            | <b><math>R_{\Omega}</math> (ohm)</b> | <b><math>R_{ct}</math> (ohm)</b> |
|--------------------------|--------------------------------------|----------------------------------|
| Ni(OH) <sub>2</sub> -r   | 5.72                                 | 446.7                            |
| w-Ni(OH) <sub>2</sub> -e | 5.46                                 | 291.5                            |
| w-Ni(OH) <sub>2</sub>    | 5.29                                 | 160                              |

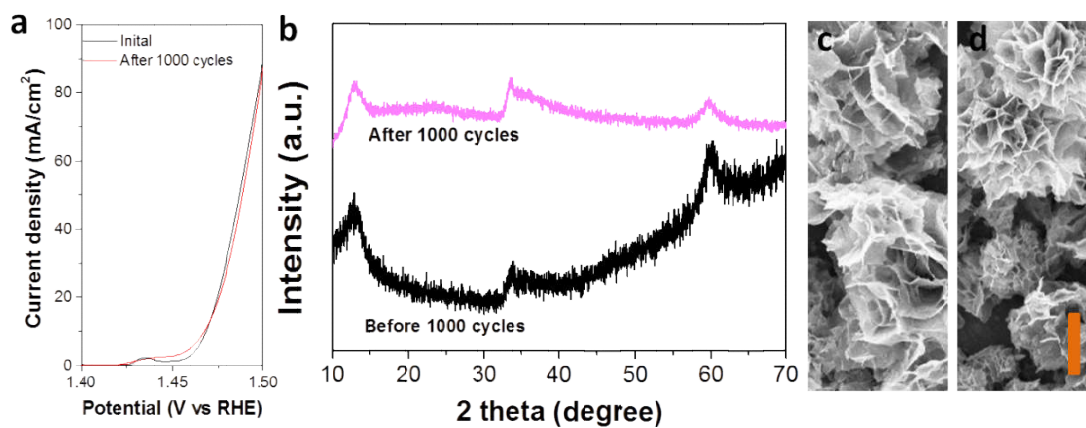

**Supplementary Figure 13.** (a) The polarization curves of w-Ni(OH)<sub>2</sub> sample after 1000 cycles. (b) XRD patterns of the w-Ni(OH)<sub>2</sub> sample before and after the 1000 cycles. (c) and (d) SEM images of the w-Ni(OH)<sub>2</sub> before and after 1000 cycles, respectively. Scale bar, 100 nm



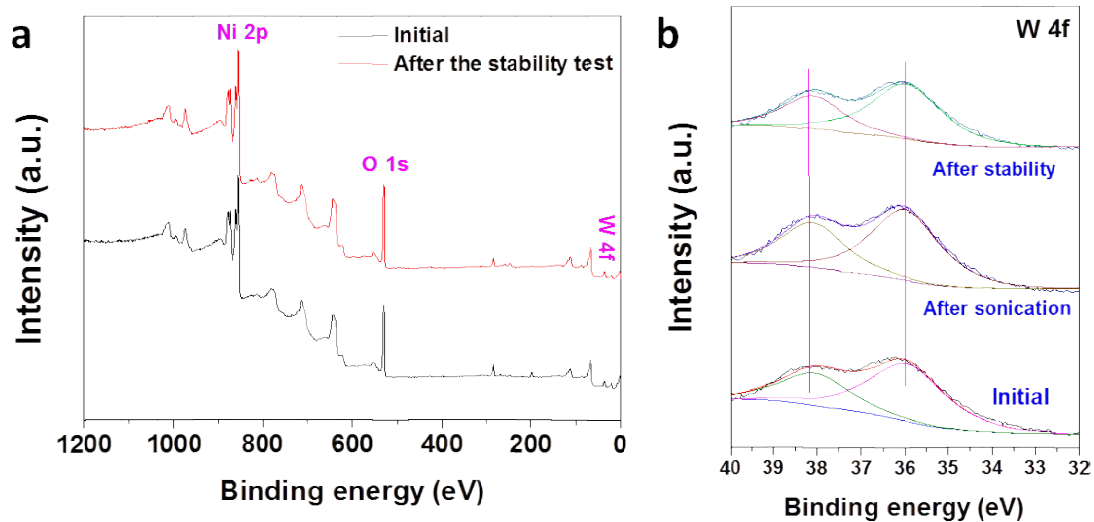

**SupplementaryFigure 14.** XPS results: (a) the wide spectrum of initial and after the stability tests; (b) W 4f spectra of the initial, after 10 h sonication and after long-time stability test .

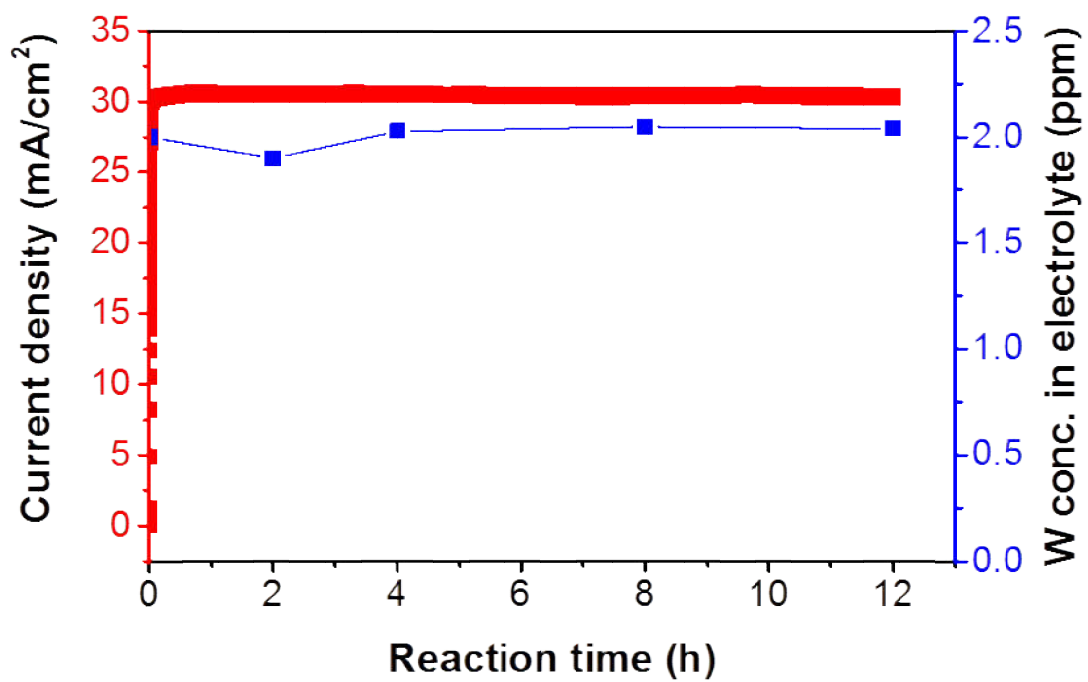

**Supplementary Figure 15.** Galvanostatic polarization curve and ICP-MS of w-Ni(OH)<sub>2</sub> in 1M KOH vs. time,

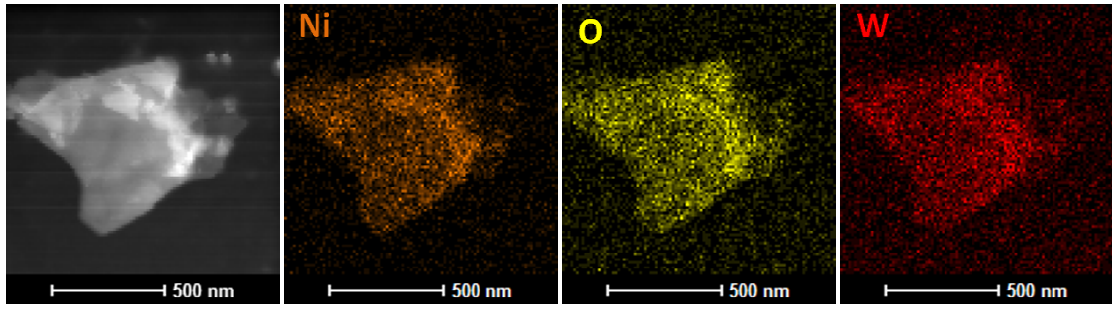

**Supplementary Figure 16.** The element mapping results after the long-time stability test.

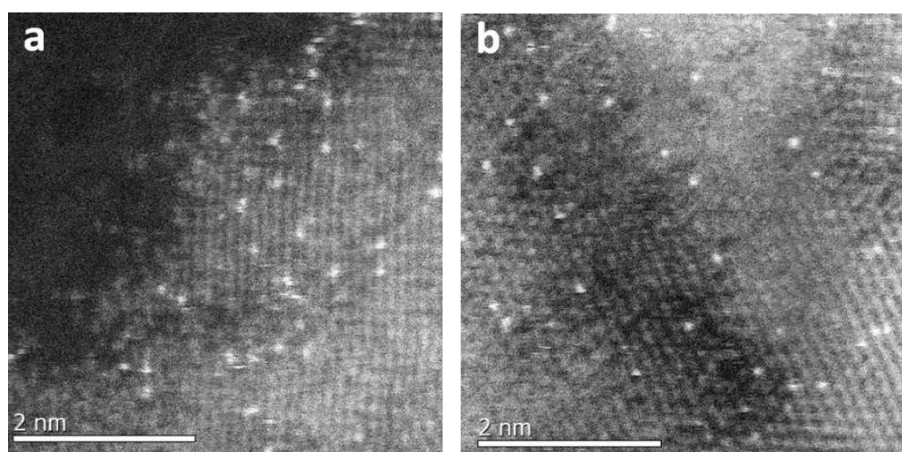

**Supplementary Figure 17.** The STEM results of w-Ni(OH)<sub>2</sub> sample (a) before and (b) after the long-time stability test.

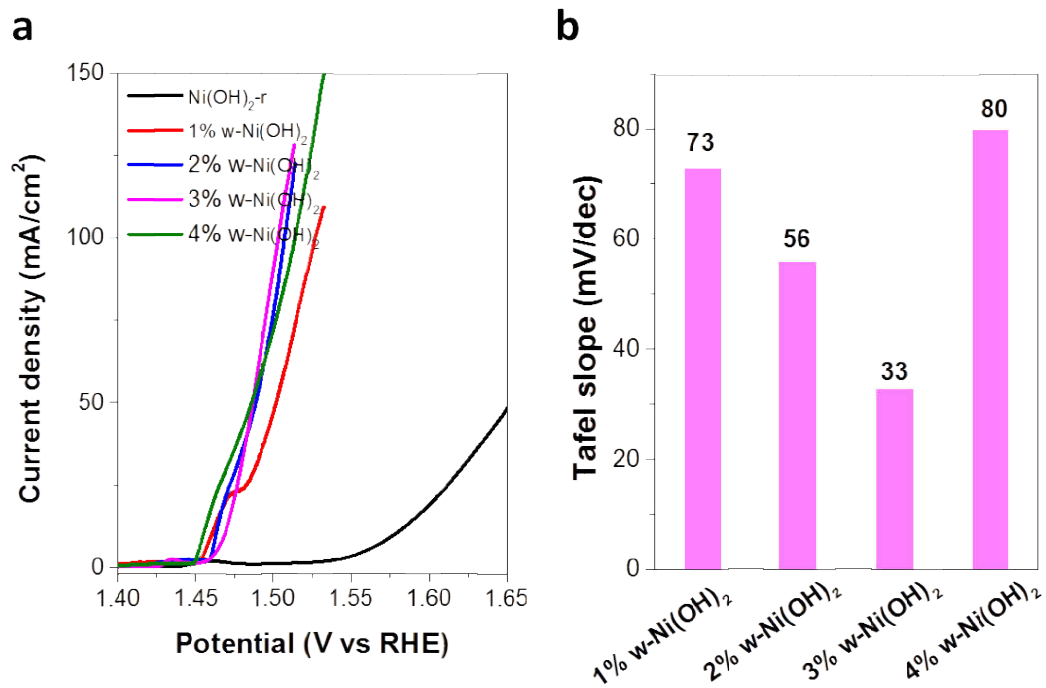

**Supplementary Figure 18.** (a) The polarization curves of w-Ni(OH)<sub>2</sub> samples with the different W element doping. (b) The corresponding Tafel slopes of the studied samples.

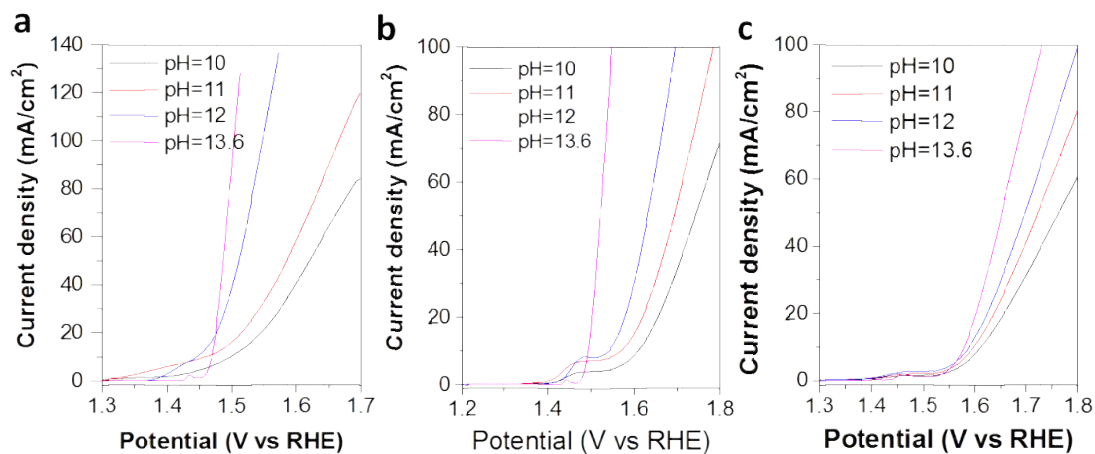

**Supplementary Figure 19.** The polarization curves of (a) Ni(OH)<sub>2</sub>-r, (b) w-Ni(OH)<sub>2</sub>-e and (c) w-Ni(OH)<sub>2</sub> sample under the different pH solution. The KOH solution was used for changing the pH.

More free OH<sup>-</sup> ions are thought to have aided adsorption onto the reaction sites and assisted in the carrier interfacial migration, promoting the oxygen evolution. Moreover, the w-Ni(OH)<sub>2</sub> exhibits the best performance under the four pH conditions, further suggesting its superiority for water oxidation in contrast to the reference catalysts.

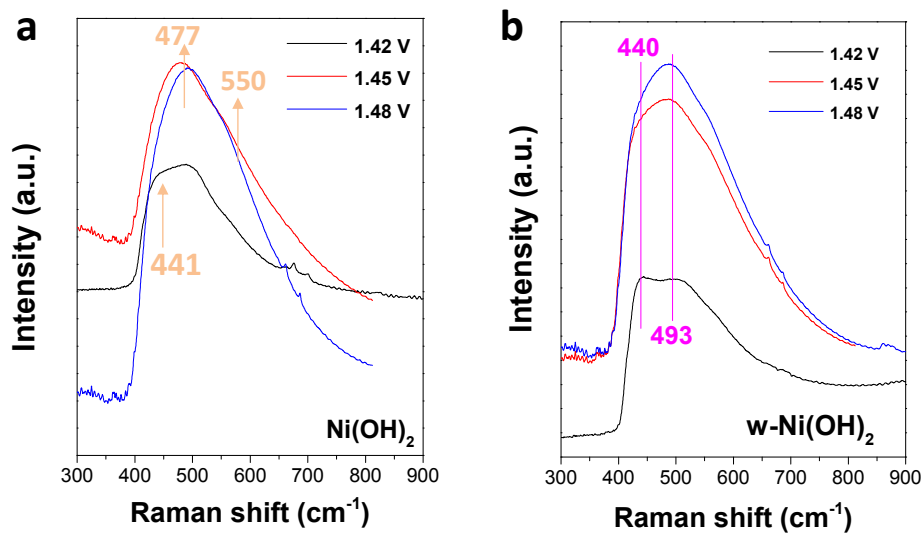

**SupplementaryFigure 20.** *In situ* Raman spectra collected on (a) Ni(OH)<sub>2</sub> and (b) w-Ni(OH)<sub>2</sub> electrodes under three potentials (1.42, 1.45 and 1.48 V vs. RHE) in 1 M KOH.

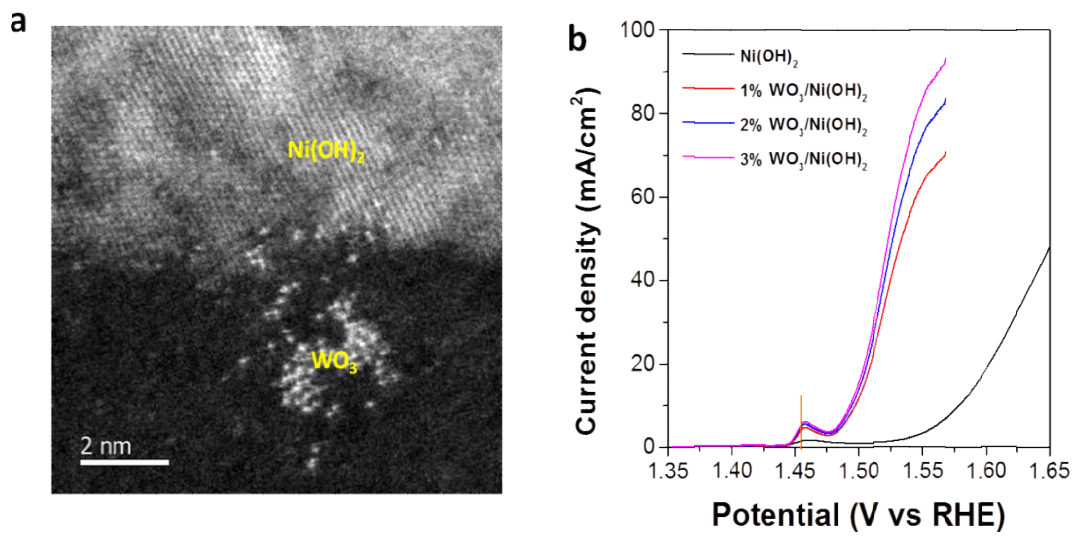

**Supplementary Figure 21.** (a) STEM image of 3% WO<sub>3</sub>/Ni(OH)<sub>2</sub> sample; (b) the OER performance of WO<sub>3</sub>/Ni(OH)<sub>2</sub> and Ni(OH)<sub>2</sub>.



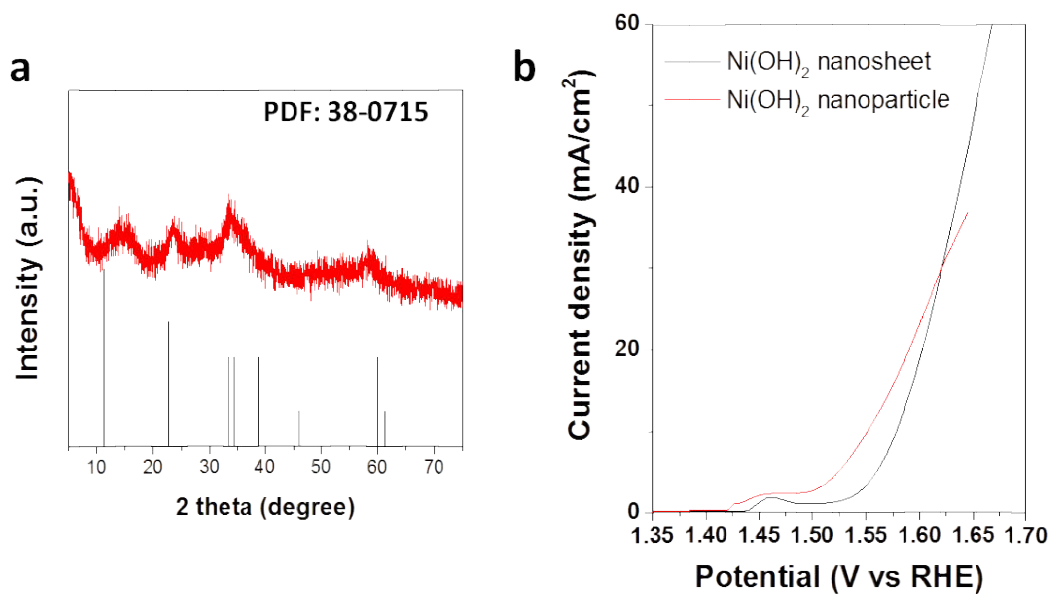

**Supplementary Figure 22.** (a) XRD of 3% WO<sub>3</sub>/Ni(OH)<sub>2</sub> sample; (b) the OER performance of WO<sub>3</sub>/Ni(OH)<sub>2</sub> and Ni(OH)<sub>2</sub>. Please note that the Ni(OH)<sub>2</sub> nanoparticles shows the low XRD intensity, suggesting its low crystallinity. Many defect sites on its surface may be responsible for the similar OER performance with our Ni(OH)<sub>2</sub> nanosheet.

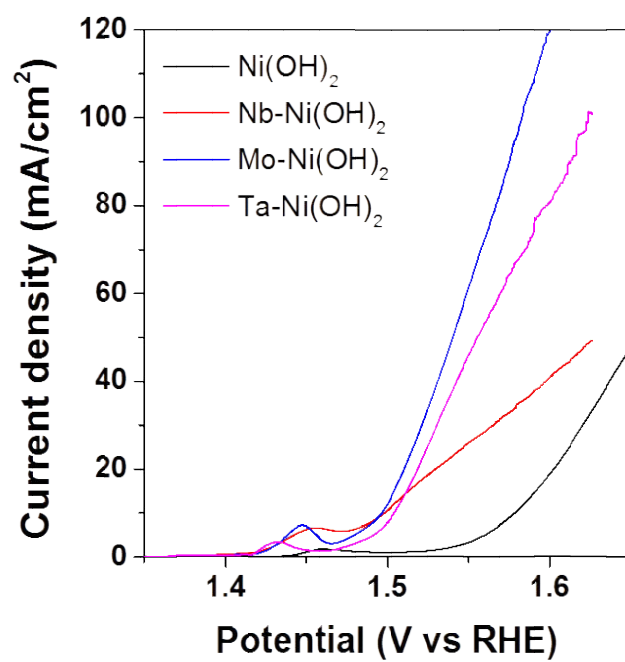

**Supplementary Figure 23.** OER performance of Nb, Mo and Ta doped Ni(OH)<sub>2</sub>. 1M KOH is the electrolyte.

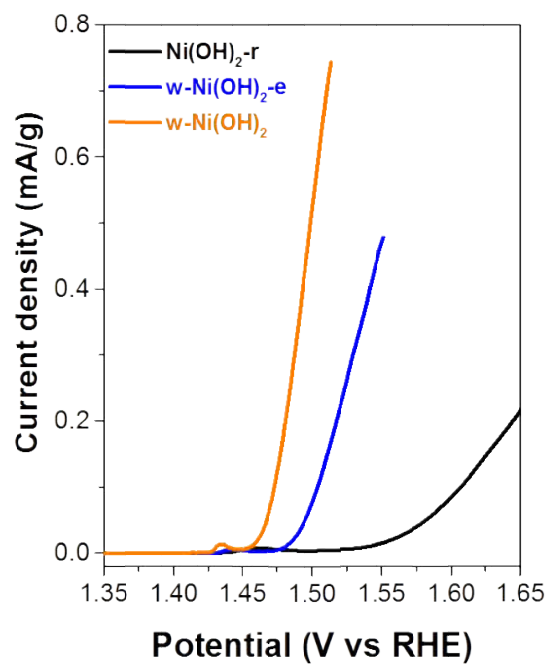

**Supplementary Figure 24.** The specific activity of the samples under study.

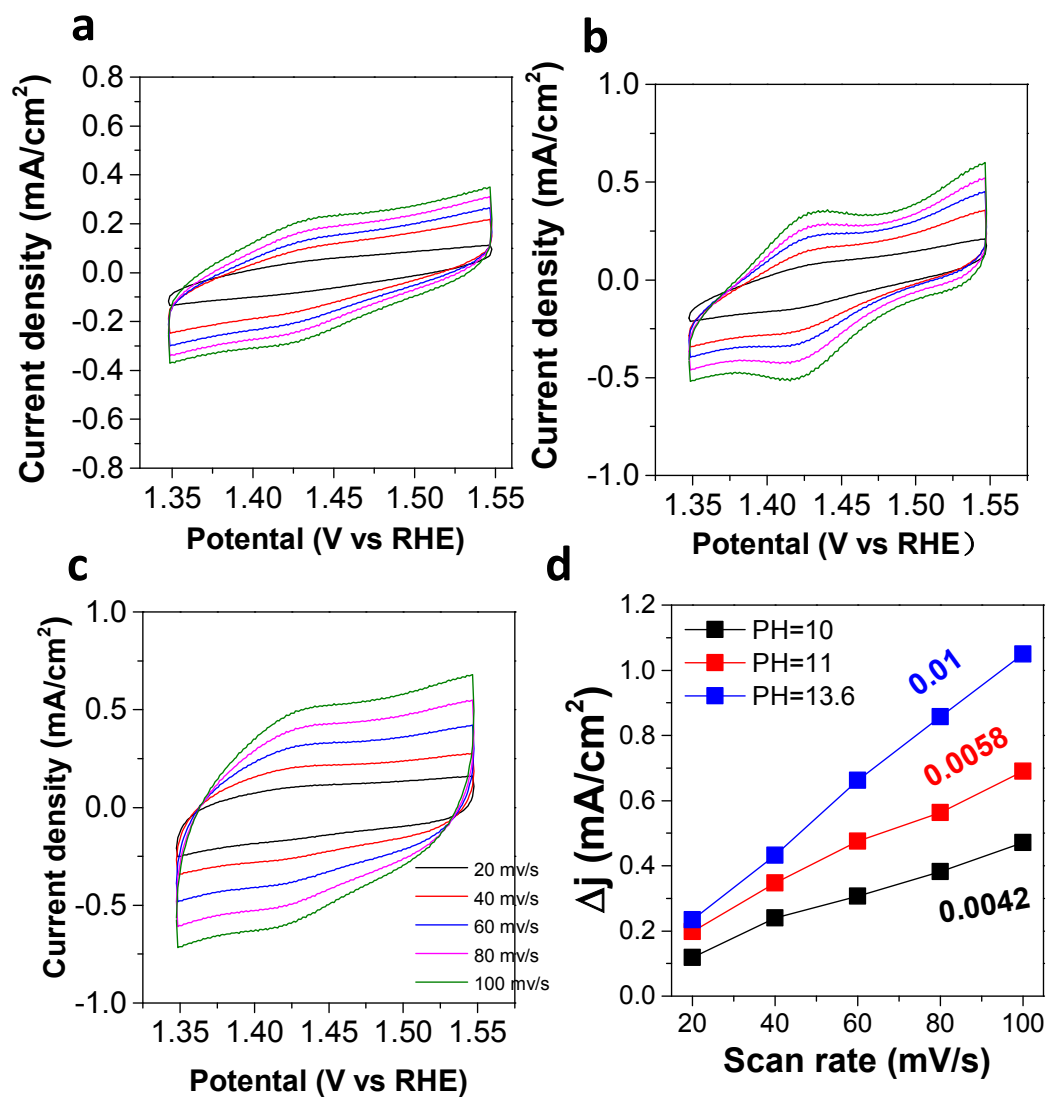

**Supplementary Figure 25.** Typical cyclic voltammetry curves of w-Ni(OH)<sub>2</sub> electrode with different scan rates in three pH solution conditions: (a) pH=10, (b) pH=11 and (c) pH=13.6. (d)  $\Delta j$  at potential of 1.45 V (vs RHE) of w-Ni(OH)<sub>2</sub> plotted against scan rates.

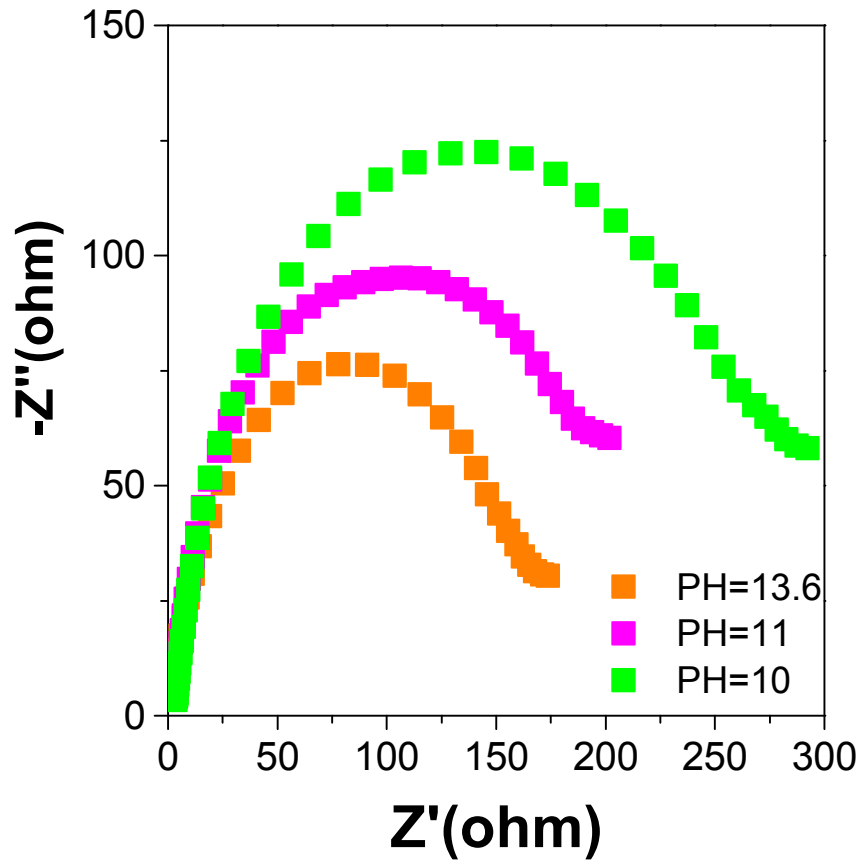

**Supplementary Figure 26.** EIS plots of w-Ni(OH)<sub>2</sub> electrode under the chosen three pH solution conditions, 13.6, 11 and 10.

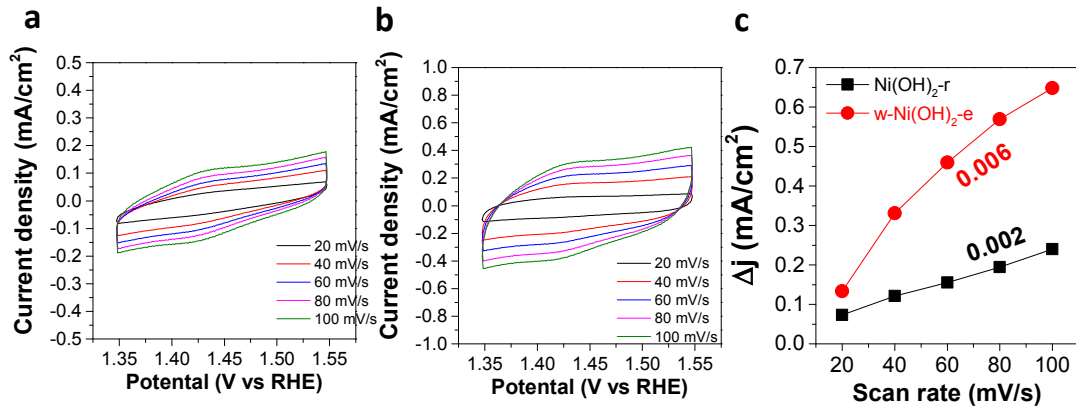

**Supplementary Figure 27.** Cyclic voltammetry curves of (a) Ni(OH)<sub>2</sub>-r and (b) w-Ni(OH)<sub>2</sub>-e electrodes with different scan rates in pH=13.6 solution conditions, (c) the corresponding  $\Delta j$  at potential of 0.45 V (vs Ag/AgCl) of Ni(OH)<sub>2</sub>-r and w-Ni(OH)<sub>2</sub>-e electrodes plotted against scan rates.

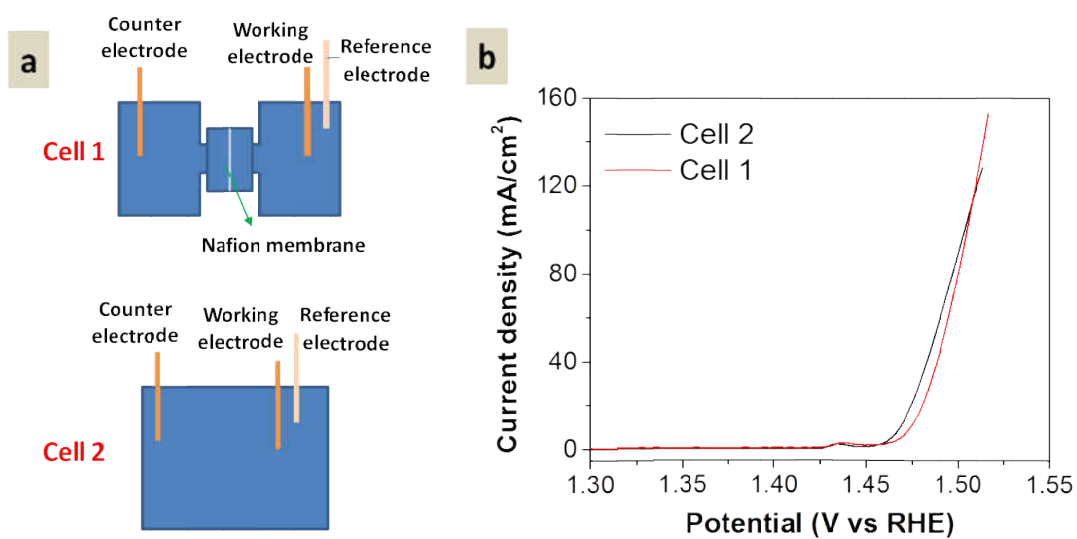

**Supplementary Figure 28.** (a) The mode of the electrocatalytic cells for the water splitting, cell 1 is similar to the real electrolyzer and the cell 2 is the experimental electrolyzer. (b) The comparison of the OER performance from the two different cells.

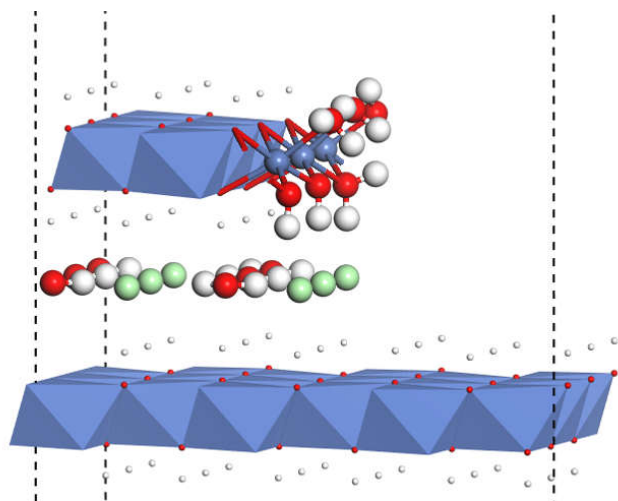

**Supplementary Figure 29.** Model of  $\alpha$ -Ni(OH)<sub>2</sub> catalyst for DFT calculations. Two layers intercalated with Cl<sup>-</sup> and H<sub>2</sub>O are shown.

**Supplementary Table 6.** The spin population of the edge Ni and W atoms at different states (1~6).

| mag( $\mu_B$ ) | Ni    | W      |
|----------------|-------|--------|
| State 1        | 1.443 | 0.012  |
| State 2        | 1.450 | 0.033  |
| State 3        | 1.438 | 0.036  |
| State 4        | 1.437 | -0.004 |
| State 5        | 1.434 | 0.005  |
| State 6        | 1.436 | 0.005  |



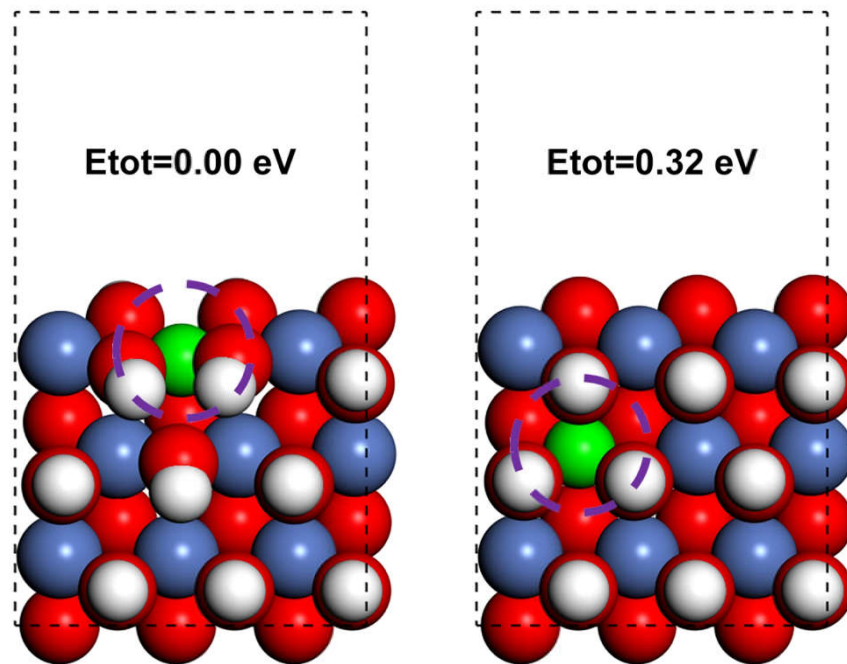

**Supplementary Figure 30.** Dopant site search of W dopant in  $\text{Ni(OH)}_2$  surface. Herein, only the first and second metal layer were taken into consideration due to that the third metal layer was constrained to simulate its bulk phase.

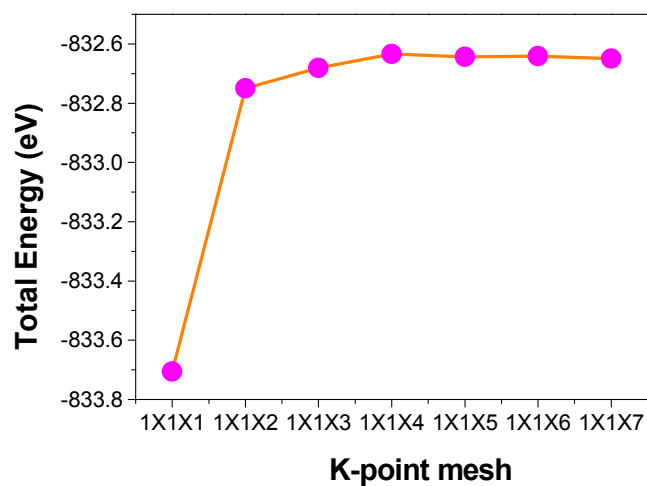

**Supplementary Figure 31.** K-point test of w-Ni(OH)<sub>2</sub> systems in DFT calculations.

We conducted the K-point test as given in Figure S28 and found that 1×1×5 K-point mesh was better to converge, thus we chose the 1×1×5 K-point mesh for all the DFT studies.

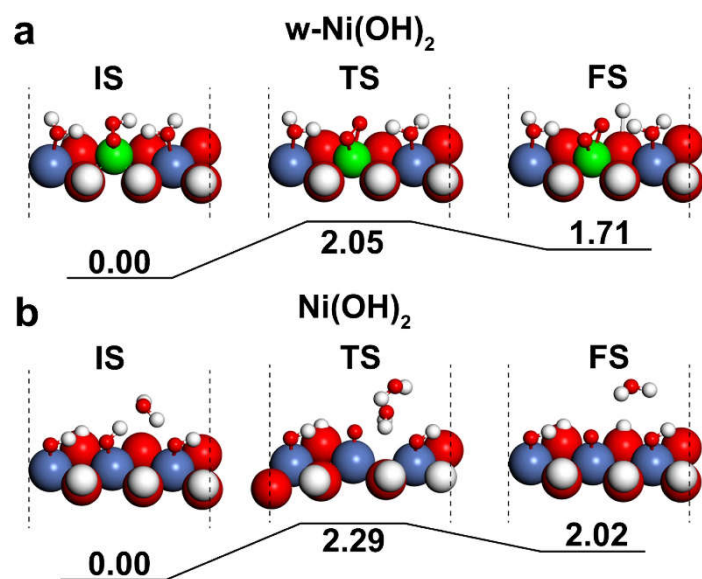

**Supplementary Figure 32.** The dynamic energy barriers of the transition state for  $w\text{-Ni(OH)}_2$  and  $\text{Ni(OH)}_2$  at the potential determining step.

**Supplementary Table 7.** The optimized atomic Cartesian positions of pristine Ni(OH)<sub>2</sub> and w-doped Ni(OH)<sub>2</sub>.

| Pristine Ni(OH) <sub>2</sub> |               |              |    |
|------------------------------|---------------|--------------|----|
| 1.0                          |               |              |    |
| 16.3799991608                | 0.0000000000  | 0.0000000000 |    |
| 0.0000000000                 | 30.0000000000 | 0.0000000000 |    |
| 0.0000000000                 | 0.0000000000  | 9.3599996567 |    |
| Cl                           | H             | Ni           | O  |
| 6                            | 72            | 27           | 66 |
| Cartesian                    |               |              |    |
| 2.730054372                  | 16.992899179  | 8.687296210  |    |
| 8.189999580                  | 16.992899179  | 8.687296210  |    |
| 2.730054372                  | 16.992899179  | 5.567234026  |    |
| 8.189999580                  | 16.992899179  | 5.567234026  |    |
| 2.730054372                  | 16.992899179  | 2.447265569  |    |
| 8.189999580                  | 16.992899179  | 2.447265569  |    |
| 4.541682191                  | 11.127299666  | 8.959579039  |    |
| 0.918262773                  | 22.858500481  | 8.959579039  |    |
| 5.439470229                  | 15.077700019  | 7.394118748  |    |
| 0.020474998                  | 18.908100128  | 7.394118748  |    |
| 1.746599269                  | 11.102999747  | 7.397394734  |    |
| 3.429009383                  | 22.846493125  | 7.411963720  |    |
| 2.712036556                  | 15.005400181  | 8.942637306  |    |
| 2.748072432                  | 18.980399966  | 8.942637306  |    |
| 0.793283351                  | 16.989900470  | 0.230630387  |    |
| 10.001791423                 | 11.127299666  | 8.959579039  |    |
| 6.252577779                  | 22.871729136  | 8.947071491  |    |
| 10.899578973                 | 15.077700019  | 7.394118748  |    |
| 5.394218587                  | 18.868957758  | 7.385272137  |    |
| 7.206544478                  | 11.102999747  | 7.397394734  |    |
| 8.171981520                  | 15.005400181  | 8.942637306  |    |
| 7.858602009                  | 18.946396708  | 8.966594625  |    |
| 4.666825453                  | 16.995899677  | 0.230630387  |    |
| 6.253228499                  | 16.989900470  | 0.230630387  |    |
| 15.461736143                 | 11.127299666  | 8.959579039  |    |
| 16.359523693                 | 15.077700019  | 7.394118748  |    |
| 12.666489199                 | 11.102999747  | 7.397394734  |    |
| 13.631926241                 | 15.005400181  | 8.942637306  |    |
| 4.541682191                  | 11.127299666  | 5.839516855  |    |
| 0.918262773                  | 22.858500481  | 5.839516855  |    |
| 5.439470229                  | 15.077700019  | 4.274150291  |    |

|              |              |             |
|--------------|--------------|-------------|
| 0.020474998  | 18.908100128 | 4.274150291 |
| 1.746599269  | 11.102999747 | 4.277426277 |
| 3.641021808  | 22.855551839 | 4.274590195 |
| 2.712036556  | 15.005400181 | 5.822575122 |
| 2.748072432  | 18.980399966 | 5.822575122 |
| 0.793283351  | 16.989900470 | 6.470661255 |
| 10.001791423 | 11.127299666 | 5.839516855 |
| 6.281245582  | 22.845422029 | 5.891052817 |
| 10.899578973 | 15.077700019 | 4.274150291 |
| 5.460124364  | 18.849502802 | 4.281836193 |
| 7.206544478  | 11.102999747 | 4.277426277 |
| 8.171981520  | 15.005400181 | 5.822575122 |
| 8.145609544  | 19.035932422 | 5.954585291 |
| 4.666825453  | 16.995899677 | 6.470661255 |
| 6.253228499  | 16.989900470 | 6.470661255 |
| 15.461736143 | 11.127299666 | 5.839516855 |
| 16.359523693 | 15.077700019 | 4.274150291 |
| 12.666489199 | 11.102999747 | 4.277426277 |
| 13.631926241 | 15.005400181 | 5.822575122 |
| 4.541682191  | 11.127299666 | 2.719547840 |
| 0.918262773  | 22.858500481 | 2.719547840 |
| 5.439470229  | 15.077700019 | 1.154181555 |
| 0.020474998  | 18.908100128 | 1.154181555 |
| 1.746599269  | 11.102999747 | 1.157363953 |
| 3.502551235  | 22.827438712 | 1.171034024 |
| 2.712036556  | 15.005400181 | 2.702606386 |
| 2.748072432  | 18.980399966 | 2.702606386 |
| 0.793283351  | 16.989900470 | 3.350599071 |
| 10.001791423 | 11.127299666 | 2.719547840 |
| 6.438652447  | 22.765132785 | 2.668953612 |
| 10.899578973 | 15.077700019 | 1.154181555 |
| 5.503994508  | 18.869529963 | 1.116896646 |
| 7.206544478  | 11.102999747 | 1.157363953 |
| 8.171981520  | 15.005400181 | 2.702606386 |
| 8.266183121  | 18.833511472 | 2.720647180 |
| 4.666825453  | 16.995899677 | 3.350599071 |
| 6.253228499  | 16.989900470 | 3.350599071 |
| 15.461736143 | 11.127299666 | 2.719547840 |
| 16.359523693 | 15.077700019 | 1.154181555 |
| 12.666489199 | 11.102999747 | 1.157363953 |
| 13.631926241 | 15.005400181 | 2.702606386 |
| 8.708570184  | 22.712236047 | 1.632053401 |
| 9.114302138  | 20.198165774 | 2.458807393 |

|              |              |             |
|--------------|--------------|-------------|
| 8.842317790  | 22.421908379 | 5.606770686 |
| 9.689078741  | 21.701937318 | 4.553379247 |
| 8.899834015  | 22.215600014 | 8.767298434 |
| 9.577642092  | 21.435747743 | 7.586156667 |
| 0.880424970  | 13.120199740 | 8.973151059 |
| 4.516407603  | 20.856601596 | 8.963874307 |
| 3.613591496  | 13.102200329 | 7.414804544 |
| 1.846353469  | 20.883600712 | 7.414804544 |
| 6.340370300  | 13.120199740 | 8.973151059 |
| 9.073536705  | 13.102200329 | 7.414804544 |
| 7.176045092  | 20.849812031 | 7.441701993 |
| 11.800479044 | 13.120199740 | 8.973151059 |
| 14.533645448 | 13.102200329 | 7.414804544 |
| 0.880424970  | 13.120199740 | 5.853182044 |
| 4.541044164  | 20.844338536 | 5.838616405 |
| 3.613591496  | 13.102200329 | 4.294835808 |
| 1.846353469  | 20.883600712 | 4.294835808 |
| 6.340370300  | 13.120199740 | 5.853182044 |
| 9.073536705  | 13.102200329 | 4.294835808 |
| 7.248870566  | 20.835347772 | 4.371216707 |
| 11.800479044 | 13.120199740 | 5.853182044 |
| 14.533645448 | 13.102200329 | 4.294835808 |
| 0.880424970  | 13.120199740 | 2.733213587 |
| 4.561863297  | 20.826750398 | 2.742136352 |
| 3.613591496  | 13.102200329 | 1.174773624 |
| 1.846353469  | 20.883600712 | 1.174773624 |
| 6.340370300  | 13.120199740 | 2.733213587 |
| 9.073536705  | 13.102200329 | 1.174773624 |
| 7.182929641  | 20.870139599 | 1.112992187 |
| 11.800479044 | 13.120199740 | 2.733213587 |
| 14.533645448 | 13.102200329 | 1.174773624 |
| 5.438978650  | 14.081399739 | 7.416583128 |
| 0.020966398  | 19.904399514 | 7.416583128 |
| 4.529725151  | 12.100800276 | 8.966599088 |
| 0.930220180  | 21.884999871 | 8.966599088 |
| 2.704993110  | 14.005500376 | 8.976520214 |
| 2.755115877  | 19.980300665 | 8.976520214 |
| 1.771660653  | 12.076199949 | 7.406005912 |
| 3.532242713  | 21.877795458 | 7.402253480 |
| 0.000000000  | 16.992899179 | 0.825083989 |
| 10.899087882 | 14.081399739 | 7.416583128 |
| 5.371272531  | 19.867714047 | 7.409234476 |
| 9.989670360  | 12.100800276 | 8.966599088 |

|              |              |             |
|--------------|--------------|-------------|
| 6.207301728  | 21.900978684 | 8.928424260 |
| 8.164938319  | 14.005500376 | 8.976520214 |
| 7.909304469  | 19.946052432 | 8.974544692 |
| 7.231605740  | 12.076199949 | 7.406005912 |
| 5.459945209  | 16.992899179 | 0.825083989 |
| 16.359032602 | 14.081399739 | 7.416583128 |
| 15.449779103 | 12.100800276 | 8.966599088 |
| 13.624883039 | 14.005500376 | 8.976520214 |
| 12.691551437 | 12.076199949 | 7.406005912 |
| 5.438978650  | 14.081399739 | 4.296614113 |
| 0.020966398  | 19.904399514 | 4.296614113 |
| 4.529725151  | 12.100800276 | 5.846630073 |
| 0.930220180  | 21.884999871 | 5.846630073 |
| 2.704993110  | 14.005500376 | 5.856458030 |
| 2.755115877  | 19.980300665 | 5.856458030 |
| 1.771660653  | 12.076199949 | 4.286037455 |
| 3.669248312  | 21.883850098 | 4.278371079 |
| 0.000000000  | 16.992899179 | 7.065114840 |
| 10.899087882 | 14.081399739 | 4.296614113 |
| 5.461363319  | 19.848235846 | 4.294247782 |
| 9.989670360  | 12.100800276 | 5.846630073 |
| 6.297922172  | 21.873114109 | 5.898384174 |
| 8.164938319  | 14.005500376 | 5.856458030 |
| 8.124478963  | 20.030313134 | 5.955392571 |
| 7.231605740  | 12.076199949 | 4.286037455 |
| 5.459945209  | 16.992899179 | 7.065114840 |
| 16.359032602 | 14.081399739 | 4.296614113 |
| 15.449779103 | 12.100800276 | 5.846630073 |
| 13.624883039 | 14.005500376 | 5.856458030 |
| 12.691551437 | 12.076199949 | 4.286037455 |
| 5.438978650  | 14.081399739 | 1.176645516 |
| 0.020966398  | 19.904399514 | 1.176645516 |
| 4.529725151  | 12.100800276 | 2.726567888 |
| 0.930220180  | 21.884999871 | 2.726567888 |
| 2.704993110  | 14.005500376 | 2.736489572 |
| 2.755115877  | 19.980300665 | 2.736489572 |
| 1.771660653  | 12.076199949 | 1.166068788 |
| 3.579401605  | 21.857569814 | 1.166921538 |
| 0.000000000  | 16.992899179 | 3.945146383 |
| 10.899087882 | 14.081399739 | 1.176645516 |
| 5.484984015  | 19.870110154 | 1.166813863 |
| 9.989670360  | 12.100800276 | 2.726567888 |
| 6.405997337  | 21.792578101 | 2.690286571 |

|                             |               |              |    |   |
|-----------------------------|---------------|--------------|----|---|
| 8.164938319                 | 14.005500376  | 2.736489572  |    |   |
| 8.245530939                 | 19.862984419  | 2.765687519  |    |   |
| 7.231605740                 | 12.076199949  | 1.166068788  |    |   |
| 5.459945209                 | 16.992899179  | 3.945146383  |    |   |
| 16.359032602                | 14.081399739  | 1.176645516  |    |   |
| 15.449779103                | 12.100800276  | 2.726567888  |    |   |
| 13.624883039                | 14.005500376  | 2.736489572  |    |   |
| 12.691551437                | 12.076199949  | 1.166068788  |    |   |
| 8.750201617                 | 21.972704530  | 0.998539393  |    |   |
| 8.920391494                 | 22.300111055  | 4.630525305  |    |   |
| 8.933690980                 | 22.157185078  | 7.734735334  |    |   |
| W-doped Ni(OH) <sub>2</sub> |               |              |    |   |
| 1.0                         |               |              |    |   |
| 16.3799991608               | 0.0000000000  | 0.0000000000 |    |   |
| 0.0000000000                | 30.0000000000 | 0.0000000000 |    |   |
| 0.0000000000                | 0.0000000000  | 9.3599996567 |    |   |
| Cl                          | H             | Ni           | O  | W |
| 6                           | 71            | 26           | 66 | 1 |
| Cartesian                   |               |              |    |   |
| 2.730054372                 | 16.992899179  | 8.687296210  |    |   |
| 8.189999580                 | 16.992899179  | 8.687296210  |    |   |
| 2.730054372                 | 16.992899179  | 5.567234026  |    |   |
| 8.189999580                 | 16.992899179  | 5.567234026  |    |   |
| 2.730054372                 | 16.992899179  | 2.447265569  |    |   |
| 8.189999580                 | 16.992899179  | 2.447265569  |    |   |
| 4.541682191                 | 11.127299666  | 8.959579039  |    |   |
| 0.918262773                 | 22.858500481  | 8.959579039  |    |   |
| 5.439470229                 | 15.077700019  | 7.394118748  |    |   |
| 0.020474998                 | 18.908100128  | 7.394118748  |    |   |
| 1.746599269                 | 11.102999747  | 7.397394734  |    |   |
| 3.446908332                 | 22.834081650  | 7.411578212  |    |   |
| 2.712036556                 | 15.005400181  | 8.942637306  |    |   |
| 2.748072432                 | 18.980399966  | 8.942637306  |    |   |
| 0.793283351                 | 16.989900470  | 0.230630387  |    |   |
| 10.001791423                | 11.127299666  | 8.959579039  |    |   |
| 6.458834041                 | 22.799248695  | 9.047979881  |    |   |
| 10.899578973                | 15.077700019  | 7.394118748  |    |   |
| 5.424795591                 | 18.832592368  | 7.420100126  |    |   |
| 7.206544478                 | 11.102999747  | 7.397394734  |    |   |
| 8.171981520                 | 15.005400181  | 8.942637306  |    |   |
| 8.352278303                 | 18.974844217  | 8.936138336  |    |   |
| 4.666825453                 | 16.995899677  | 0.230630387  |    |   |
| 6.253228499                 | 16.989900470  | 0.230630387  |    |   |



|              |              |             |
|--------------|--------------|-------------|
| 15.461736143 | 11.127299666 | 8.959579039 |
| 16.359523693 | 15.077700019 | 7.394118748 |
| 12.666489199 | 11.102999747 | 7.397394734 |
| 13.631926241 | 15.005400181 | 8.942637306 |
| 4.541682191  | 11.127299666 | 5.839516855 |
| 0.918262773  | 22.858500481 | 5.839516855 |
| 5.439470229  | 15.077700019 | 4.274150291 |
| 0.020474998  | 18.908100128 | 4.274150291 |
| 1.746599269  | 11.102999747 | 4.277426277 |
| 3.753155064  | 22.837661505 | 4.285872038 |
| 2.712036556  | 15.005400181 | 5.822575122 |
| 2.748072432  | 18.980399966 | 5.822575122 |
| 0.793283351  | 16.989900470 | 6.470661255 |
| 10.001791423 | 11.127299666 | 5.839516855 |
| 6.321910942  | 22.774466872 | 5.607728042 |
| 10.899578973 | 15.077700019 | 4.274150291 |
| 5.530390405  | 18.632238507 | 4.276312988 |
| 7.206544478  | 11.102999747 | 4.277426277 |
| 8.171981520  | 15.005400181 | 5.822575122 |
| 4.666825453  | 16.995899677 | 6.470661255 |
| 6.253228499  | 16.989900470 | 6.470661255 |
| 15.461736143 | 11.127299666 | 5.839516855 |
| 16.359523693 | 15.077700019 | 4.274150291 |
| 12.666489199 | 11.102999747 | 4.277426277 |
| 13.631926241 | 15.005400181 | 5.822575122 |
| 4.541682191  | 11.127299666 | 2.719547840 |
| 0.918262773  | 22.858500481 | 2.719547840 |
| 5.439470229  | 15.077700019 | 1.154181555 |
| 0.020474998  | 18.908100128 | 1.154181555 |
| 1.746599269  | 11.102999747 | 1.157363953 |
| 3.719764782  | 22.886738777 | 1.235151734 |
| 2.712036556  | 15.005400181 | 2.702606386 |
| 2.748072432  | 18.980399966 | 2.702606386 |
| 0.793283351  | 16.989900470 | 3.350599071 |
| 10.001791423 | 11.127299666 | 2.719547840 |
| 6.622750059  | 22.770325541 | 2.953293485 |
| 10.899578973 | 15.077700019 | 1.154181555 |
| 5.470104349  | 18.839875460 | 1.191822752 |
| 7.206544478  | 11.102999747 | 1.157363953 |
| 8.171981520  | 15.005400181 | 2.702606386 |
| 8.316591707  | 18.753851652 | 2.686121294 |
| 4.666825453  | 16.995899677 | 3.350599071 |
| 6.253228499  | 16.989900470 | 3.350599071 |

|              |              |             |
|--------------|--------------|-------------|
| 15.461736143 | 11.127299666 | 2.719547840 |
| 16.359523693 | 15.077700019 | 1.154181555 |
| 12.666489199 | 11.102999747 | 1.157363953 |
| 13.631926241 | 15.005400181 | 2.702606386 |
| 9.772521250  | 21.725395918 | 1.703357833 |
| 9.246083427  | 21.065801382 | 0.358163988 |
| 9.524514443  | 21.944906116 | 5.429140521 |
| 10.038189759 | 21.206556559 | 4.133027950 |
| 9.868490974  | 22.447822094 | 7.914592076 |
| 9.666158558  | 20.971793532 | 7.470674269 |
| 0.880424970  | 13.120199740 | 8.973151059 |
| 4.557161809  | 20.845402479 | 9.033708813 |
| 3.613591496  | 13.102200329 | 7.414804544 |
| 1.846353469  | 20.883600712 | 7.414804544 |
| 6.340370300  | 13.120199740 | 8.973151059 |
| 9.073536705  | 13.102200329 | 7.414804544 |
| 7.173285024  | 20.742684603 | 7.548151440 |
| 11.800479044 | 13.120199740 | 8.973151059 |
| 14.533645448 | 13.102200329 | 7.414804544 |
| 0.880424970  | 13.120199740 | 5.853182044 |
| 4.527555271  | 20.835562348 | 5.909312866 |
| 3.613591496  | 13.102200329 | 4.294835808 |
| 1.846353469  | 20.883600712 | 4.294835808 |
| 6.340370300  | 13.120199740 | 5.853182044 |
| 9.073536705  | 13.102200329 | 4.294835808 |
| 11.800479044 | 13.120199740 | 5.853182044 |
| 14.533645448 | 13.102200329 | 4.294835808 |
| 0.880424970  | 13.120199740 | 2.733213587 |
| 4.562518411  | 20.832771063 | 2.742943632 |
| 3.613591496  | 13.102200329 | 1.174773624 |
| 1.846353469  | 20.883600712 | 1.174773624 |
| 6.340370300  | 13.120199740 | 2.733213587 |
| 9.073536705  | 13.102200329 | 1.174773624 |
| 7.287536903  | 20.754160881 | 1.204901868 |
| 11.800479044 | 13.120199740 | 2.733213587 |
| 14.533645448 | 13.102200329 | 1.174773624 |
| 5.438978650  | 14.081399739 | 7.416583128 |
| 0.020966398  | 19.904399514 | 7.416583128 |
| 4.529725151  | 12.100800276 | 8.966599088 |
| 0.930220180  | 21.884999871 | 8.966599088 |
| 2.704993110  | 14.005500376 | 8.976520214 |
| 2.755115877  | 19.980300665 | 8.976520214 |
| 1.771660653  | 12.076199949 | 7.406005912 |

|              |              |             |
|--------------|--------------|-------------|
| 3.564752595  | 21.868141294 | 7.435753669 |
| 0.000000000  | 16.992899179 | 0.825083989 |
| 10.899087882 | 14.081399739 | 7.416583128 |
| 5.403476091  | 19.834715724 | 7.460884250 |
| 9.989670360  | 12.100800276 | 8.966599088 |
| 6.391135733  | 21.830611825 | 9.051898009 |
| 8.164938319  | 14.005500376 | 8.976520214 |
| 8.277329812  | 19.975633621 | 8.975605817 |
| 7.231605740  | 12.076199949 | 7.406005912 |
| 5.459945209  | 16.992899179 | 0.825083989 |
| 16.359032602 | 14.081399739 | 7.416583128 |
| 15.449779103 | 12.100800276 | 8.966599088 |
| 13.624883039 | 14.005500376 | 8.976520214 |
| 12.691551437 | 12.076199949 | 7.406005912 |
| 5.438978650  | 14.081399739 | 4.296614113 |
| 0.020966398  | 19.904399514 | 4.296614113 |
| 4.529725151  | 12.100800276 | 5.846630073 |
| 0.930220180  | 21.884999871 | 5.846630073 |
| 2.704993110  | 14.005500376 | 5.856458030 |
| 2.755115877  | 19.980300665 | 5.856458030 |
| 1.771660653  | 12.076199949 | 4.286037455 |
| 3.784116251  | 21.866875291 | 4.304841177 |
| 0.000000000  | 16.992899179 | 7.065114840 |
| 10.899087882 | 14.081399739 | 4.296614113 |
| 5.619335477  | 19.656284451 | 4.349590850 |
| 9.989670360  | 12.100800276 | 5.846630073 |
| 6.366114989  | 21.824313998 | 5.802535931 |
| 8.164938319  | 14.005500376 | 5.856458030 |
| 8.051609554  | 19.898843765 | 5.941006576 |
| 7.231605740  | 12.076199949 | 4.286037455 |
| 5.459945209  | 16.992899179 | 7.065114840 |
| 16.359032602 | 14.081399739 | 4.296614113 |
| 15.449779103 | 12.100800276 | 5.846630073 |
| 13.624883039 | 14.005500376 | 5.856458030 |
| 12.691551437 | 12.076199949 | 4.286037455 |
| 5.438978650  | 14.081399739 | 1.176645516 |
| 0.020966398  | 19.904399514 | 1.176645516 |
| 4.529725151  | 12.100800276 | 2.726567888 |
| 0.930220180  | 21.884999871 | 2.726567888 |
| 2.704993110  | 14.005500376 | 2.736489572 |
| 2.755115877  | 19.980300665 | 2.736489572 |
| 1.771660653  | 12.076199949 | 1.166068788 |
| 3.743132121  | 21.916115284 | 1.219655380 |

|              |              |             |
|--------------|--------------|-------------|
| 0.000000000  | 16.992899179 | 3.945146383 |
| 10.899087882 | 14.081399739 | 1.176645516 |
| 5.487078718  | 19.838631749 | 1.239116586 |
| 9.989670360  | 12.100800276 | 2.726567888 |
| 6.585287042  | 21.801338196 | 2.947078206 |
| 8.164938319  | 14.005500376 | 2.736489572 |
| 8.266985659  | 19.787104726 | 2.849795325 |
| 7.231605740  | 12.076199949 | 1.166068788 |
| 5.459945209  | 16.992899179 | 3.945146383 |
| 16.359032602 | 14.081399739 | 1.176645516 |
| 15.449779103 | 12.100800276 | 2.726567888 |
| 13.624883039 | 14.005500376 | 2.736489572 |
| 12.691551437 | 12.076199949 | 1.166068788 |
| 9.236192288  | 21.917104125 | 0.912816189 |
| 9.311894501  | 21.778619885 | 4.458591014 |
| 9.628535911  | 21.897681355 | 7.145481372 |
| 7.405589123  | 20.513037443 | 4.430063104 |

## Supplementary References

- 1 P. Zhang, L. Li, D. Nordlund, H. Chen, L. Fan, B. Zhang, X. Sheng, Q. Daniel, L. Sun, *Nature Commun.* **2018**, *9*, 381.
- 2 H. Liang, A. N. Gandi, C. Xia, M. N. Hedhili, D. H. Anjum, U. Schwingenschlögl, H. N. Alshareef, *ACS Energy Lett.* **2017**, *2*, 1035-1042.
- 3 J. Zhang, J. Liu, L. Xi, Y. Yu, N. Chen, S. Sun, W. Wang, K. M. Lange, B. Zhang, *J. Am. Chem. Soc.* **2018**, *140*, 3876-3879.
- 4 P. Li, X. Duan, Y. Kuang, Y. Li, G. Zhang, W. Liu, X. Sun, *Adv. Energy Mater.* **2018**, *8*, 1703341.
- 5 K. Fan, H. Chen, Y. Ji, H. Huang, P. M. Claesson, Q. Daniel, B. Philippe, H. Rensmo, F. Li, Y. Luo, L. Sun, *Nature Commun.* **2016**, *7*, 11981.
- 6 H. Liang, F. Meng, M. Cabán-Acevedo, L. Li, A. Forticaux, L. Xiu, Z. Wang, S. Jin, *Nano Lett.* **2015**, *15*, 1421-1427.
- 7 Y. Yang, L. Dang, M. J. Shearer, H. Sheng, W. Li, J. Chen, P. Xiao, Y. Zhang, R. J. Hamers, S. Jin, *Adv. Energy Mater.* **2018**, *8*, 1703189
- 8 H. Zhang, X. Li, A. Hähnel, V. Naumann, C. Lin, S. Azimi, S. L. Schweizer, A. W. Maijenburg, R. B. Wehrspohn, *Adv. Funct. Mater.* **2018**, *28*, 1706847.
- 9 X. Long, J. Li, S. Xiao, K. Yan, Z. Wang, H. Chen, S. Yang, *Angew. Chem. Int. Ed.* **2014**, *53*, 7584-7588.
- 10 W. Ma, R. Ma, C. Wang, J. Liang, X. Liu, K. Zhou, T. Sasaki, *ACS Nano* **2015**, *9*, 1977-1984.

- 11 X. Kong, C. Zhang, S. Y. Hwang, Q. Chen, Z. Peng, *Small* **2017**, *13*, 1700334.
- 12 G. Chen, T. Wang, J. Zhang, P. Liu, H. Sun, X. Zhuang, M. Chen, X. Feng, *Adv. Mater.* **2018**, 1706279.
- 13 M. Asnavandi, Y. Yin, Y. Li, C. Sun, C. Zhao, *ACS Energy Lett.* **2018**, *3*, 1515-1520.
- 14 J. Jiang, F. Sun, S. Zhou, W. Hu, H. Zhang, J. Dong, Z. Jiang, J. Zhao, J. Li, W. Yan, M. Wang, *Nature Commun.* **2018**, *9*, 2885.
